# Supplementary material for: Plasma proteomic analysis reveals key pathways associated with divergent residual body weight gain phenotype in beef steers
Source: Front Vet Sci. 2024 Jul 22;11:1415594. doi: 10.3389/fvets.2024.1415594 (PMC11298483; doi:10.3389/fvets.2024.1415594)
Supplement: SUPPLEMENTARY TABLE 1 — List of differentially abundant proteins detected and identified between negative-RADG and positive-RADG beef steers. [file Table_1.XLSX]

## Sheet: Sheet1
#ID	Protein names	Gene Names
A0A3Q1MDK7	Histone H2A	H2AC10
A0A0A0MP92	Endopin 2	SERPINA3-7
A0A0A0MPA0	Serpin domain-containing protein	LOC784932
A0A3Q1MB98	Haptoglobin	HP
P17690	Beta-2-glycoprotein 1 (Apolipoprotein H) (Apo-H) (Beta-2-glycoprotein I) (B2GPI) (Beta(2)GPI)	APOH
A0A140T851	"Protein C, inactivator of coagulation factors Va and VIIIa"	PROC
A0A3Q1MGI2	Apolipoprotein E	APOE
A0A140T891	Vanin 1	VNN1
A0A140T897	Albumin	ALB
P01044	Kininogen-1 (Kininogen I) (Thiol proteinase inhibitor) [Cleaved into: Kininogen-1 heavy chain; Bradykinin (Kallidin I); Lysyl-bradykinin (Kallidin II); Kininogen-1 light chain]	KNG1
A0A173FDE5	Non-MHC class I antigen	BoLA
P01966	Hemoglobin subunit alpha (Alpha-globin) (Hemoglobin alpha chain) [Cleaved into: Hemopressin]	HBA
P02192	Myoglobin	MB
A0A3B0IZF8	Adiponectin B (Complement C1q C chain)	C1QC ADIB
Q2KIV9	Complement C1q subcomponent subunit B	C1QB
Q3Y5Z3	"Adiponectin (30 kDa adipocyte complement-related protein) (Adipocyte complement-related 30 kDa protein) (ACRP30) (Adipocyte, C1q and collagen domain-containing protein) (Adipose most abundant gene transcript 1 protein) (apM-1)"	ADIPOQ ACRP30 APM1
A0A3Q1LGA6	phosphopyruvate hydratase (EC 4.2.1.11) (2-phospho-D-glycerate hydro-lyase)	ENO1
A0A3Q1M2A8	Complement factor I	CFI
F1MVL2	Acyl-CoA dehydrogenase short chain	ACADS
A0A3Q1LHD8	Ribosomal protein S6 kinase (EC 2.7.11.1)	RPS6KA3
Q29423	CD44 antigen (Extracellular matrix receptor III) (ECMR-III) (GP90 lymphocyte homing/adhesion receptor) (HUTCH-I) (Hermes antigen) (Hyaluronate receptor) (Phagocytic glycoprotein 1) (PGP-1) (Phagocytic glycoprotein I) (PGP-I) (CD antigen CD44)	CD44
F1N045	Complement C7	C7
A0A3Q1LI44	Ig-like domain-containing protein	-
A0A3Q1LJT1	Ig-like domain-containing protein	-
A0A3Q1LJX2	Uncharacterized protein	-
A0A3Q1LK49	Inter-alpha-trypsin inhibitor heavy chain 2	ITIH2
A0A3Q1LKB0	Lipopolysaccharide-binding protein (LBP)	LBP
A0A3Q1NJ24	Carboxypeptidase B2	CPB2
A0A3Q1M7D4	Very low density lipoprotein receptor	VLDLR
A0A3Q1LL87	Ig-like domain-containing protein	-
G3MWT1	Ig-like domain-containing protein	-
F5XVA9	von Willebrand factor (vWF)	VWF
Q29RU4	Complement component C6	C6
G3MZF2	[histone H3]-lysine(4) N-methyltransferase (EC 2.1.1.364)	KMT2D
A6QLL8	Fructose-bisphosphate aldolase (EC 4.1.2.13)	ALDOA
A0A3Q1LMI9	"Afadin, adherens junction formation factor"	AFDN
A0A3Q1LMX5	ABC-type glutathione-S-conjugate transporter (EC 7.6.2.3)	ABCC1
A0A3Q1LP66	Plasma serine protease inhibitor	SERPINA5
A0A3Q1LPG0	Ig-like domain-containing protein	-
A0A3Q1LPQ0	Protein disulfide-isomerase (EC 5.3.4.1)	P4HB
A0A3Q1LQ21	Inter-alpha-trypsin inhibitor heavy chain 3	ITIH3
A0A3Q1M5I7	SH3 domain-containing protein	DST
Q0VC51	Interleukin 1 receptor accessory protein	IL1RAP
A0A3Q1ML95	Kinesin family member 21B	KIF21B
A0A3Q1LRP4	Fumarylacetoacetase (EC 3.7.1.2) (Fumarylacetoacetate hydrolase)	FAH
Q5JB60	Nucleolin	NCL
A0A3Q1LS74	Complement factor H	CFH
A0A3Q1LSD2	FERM domain containing 6	FRMD6
A0A3Q1LSP4	Complement C8 alpha chain	C8A
A0A3Q1MFF3	Carboxypeptidase Q (Plasma glutamate carboxypeptidase)	CPQ
A0A3Q1LSX3	Macrophage stimulating 1	MST1
Q58DR9	Malate dehydrogenase (EC 1.1.1.37)	MDH2
A0A3Q1LTB9	Coagulation factor XIII A chain	F13A1
A0A3Q1ME66	"ADP/ATP translocase (ADP,ATP carrier protein)"	-
Q2KII3	Hepatitis A virus cellular receptor 1 N-terminal domain containing protein	MGC137099
A0A3Q1LWV8	Ig-like domain-containing protein	-
A6QQE6	MSH3 protein	MSH3
A0A3Q1LUU3	Signal transducing adaptor molecule	STAM
A0A3Q1LUW5	Striatin	STRN
E1BHN4	Uncharacterized protein	LOC509283
Q2HJ49	Moesin (Membrane-organizing extension spike protein)	MSN
A0A3Q1LW96	Inter-alpha-trypsin inhibitor heavy chain 1	ITIH1
Q2KHW7	Regulator of G-protein signaling 10 (RGS10)	RGS10
P19858	L-lactate dehydrogenase A chain (LDH-A) (EC 1.1.1.27) (LDH muscle subunit) (LDH-M)	LDHA
O77765	Superficial zone protein	-
A0A3Q1LZ90	Ig-like domain-containing protein	-
A0A3Q1LZI9	RNA-directed DNA polymerase (EC 2.7.7.49)	-
Q2KIS7	Tetranectin (TN) (C-type lectin domain family 3 member B)	CLEC3B
A0A3Q1LZU8	Glucosidase II alpha subunit	GANAB
A7E374	SRRM2 protein	SRRM2
P04815	Spleen trypsin inhibitor I (SI-I) [Cleaved into: Spleen trypsin inhibitor II (SI-II); Spleen trypsin inhibitor III (SI-III)]	-
A0A3Q1MIL5	Ig-like domain-containing protein	-
A0A3Q1M1Z1	Histone H4	-
A0A3Q1MNU0	MIA SH3 domain ER export factor 3	MIA3
A0A3Q1MHU8	Complement factor properdin	CFP
A0A3Q1M3A8	Ig-like domain-containing protein	-
A0A3Q1M3L6	Ig-like domain-containing protein	-
A0A3Q1M4E7	RNA-directed DNA polymerase (EC 2.7.7.49)	-
A0A3Q1M4K3	Ubiquitin-like domain-containing protein	LOC101902760
Q5E9F8	Histone H3.3	H3-3A H3F3A; H3-3B H3F3B
A0A3Q1M5Q6	Extracellular matrix protein 1	ECM1
Q5E9B1	L-lactate dehydrogenase B chain (LDH-B) (EC 1.1.1.27)	LDHB
A0A3Q1MUR2	Ig-like domain-containing protein	-
A0A3Q1M7Y8	procollagen-lysine 5-dioxygenase (EC 1.14.11.4)	PLOD1
A5D9H5	Heterogeneous nuclear ribonucleoprotein D (Heteroous nuclear ribonucleoprotein D)	HNRNPD HNRPD
A0A3Q1M8I5	Alpha-2-macroglobulin	LOC506828
A0A3Q1M9G8	Ubiquitin-like domain-containing protein	-
A0A3Q1N764	Collectin subfamily member 11	COLEC11
G3X6L5	ADP ribosylation factor like GTPase 8A	ARL8A
A0A3Q1MDR9	Serine and arginine rich splicing factor 7	SRSF7
J9QDU2	Periostin variant 6	-
Q862H8	40S ribosomal protein SA	-
A0A3Q1MFI7	Ig-like domain-containing protein	LOC104968484
F1MAV0	Fibrinogen beta chain	FGB
A0A3Q1MG73	Fibulin-1	FBLN1
A5D9E9	"Complement C1r (Complement component 1, r subcomponent)"	C1R
A0A3Q1MGZ6	Serpin domain-containing protein	LOC112445741
A0A3Q1MI29	Ig-like domain-containing protein	-
A0A3Q1MIN7	Ig-like domain-containing protein	-
A0A3Q1MIR5	Peroxiredoxin C-terminal domain-containing protein	-
A0A3Q1N0S5	EGF containing fibulin extracellular matrix protein 1	EFEMP1
A0A3Q1MJF8	RRM domain-containing protein	-
Q2KJF1	Alpha-1B-glycoprotein (Alpha-1-B glycoprotein)	A1BG
A0A3Q1ML26	Ig-like domain-containing protein	-
A0A3Q1MMC8	Histone deacetylase complex subunit SAP18	-
A0A3Q1NAF6	Protein S	PROS1
A0A3Q1MNL9	Transforming growth factor beta induced	TGFBI
A0A3Q1MNN6	Alpha-2-macroglobulin	LOC506828
A0A3Q1MNT6	Deoxyuridine 5'-triphosphate nucleotidohydrolase (dUTPase) (EC 3.6.1.23) (dUTP pyrophosphatase)	DUT
A0A3Q1MQB1	SET protein	LOC782688
P09867	"Heterogeneous nuclear ribonucleoprotein A1 (hnRNP A1) (Helix-destabilizing protein) (Single-strand RNA-binding protein) (Unwinding protein 1) (UP1) (hnRNP core protein A1) [Cleaved into: Heterogeneous nuclear ribonucleoprotein A1, N-terminally processed]"	HNRNPA1 HNRPA1
F1N3A1	Thrombospondin 1	THBS1
A0A3Q1MR54	Complement C8 gamma chain	C8G
A8YXZ2	C8G protein	C8G
A0A3Q1MSF6	Ig-like domain-containing protein	-
P18902	Retinol-binding protein 4 (Plasma retinol-binding protein) (PRBP) (RBP)	RBP4
A0A3Q1MU67	Cyclin dependent kinase 1	CDK1
Q862Q3	Beta-2-microglobulin	-
A0A3Q1MUU9	T-complex protein 1 subunit eta (TCP-1-eta) (CCT-eta)	CCT7
A0A3Q1MWQ1	Coagulation factor XIII B chain	F13B
A7MB59	MAD1L1 protein (Mitotic arrest deficient 1 like 1)	MAD1L1
A0A3Q1MZ77	CutA divalent cation tolerance homolog	CUTA
A0A3Q1N134	Heteroous nuclear ribonucleoprotein U	HNRNPU
A0A3Q1N2B9	Ig-like domain-containing protein	-
A0A3Q1N2C2	Albumin domain-containing protein	LOC100140503
P61603	"10 kDa heat shock protein, mitochondrial (Hsp10) (10 kDa chaperonin) (Chaperonin 10) (CPN10)"	HSPE1
A0A3Q1NEH2	K Homology domain-containing protein	-
A6QQA8	Sulfhydryl oxidase (EC 1.8.3.2)	QSOX1
A0A3Q1NCL2	Ankyrin 1	-
A0A3Q1NEQ0	Inhibitor of carbonic anhydrase	INHCA
A0A3Q1NGC5	Peptidase D	PEPD
A0A3Q1NJB1	Ceruloplasmin	CP
G3MX45	60S ribosomal protein L31	-
A0A3Q1NJR8	Antithrombin-III (Serpin C1)	SERPINC1
A0A3Q1NNJ3	Biliverdin reductase B	BLVRB
Q3SYW2	Complement C2 (EC 3.4.21.43) (C3/C5 convertase) [Cleaved into: Complement C2b fragment; Complement C2a fragment]	C2
A0A452DHX8	Amine oxidase (EC 1.4.3.-)	LOC100138645
Q3MHW2	F10 protein	F10
A0A452DIU6	"DNA polymerase delta 4, accessory subunit"	POLD4
Q5E956	Triosephosphate isomerase (TIM) (EC 5.3.1.1) (Methylglyoxal synthase) (EC 4.2.3.3) (Triose-phosphate isomerase)	TPI1
P35541	Serum amyloid A protein (SAA) [Cleaved into: Amyloid protein A (Amyloid fibril protein AA)]	SAA1 SAA
Q3SWW8	Thrombospondin-4	THBS4
A0A452DJ66	Tubulin alpha chain	TUBA1D
F2Z4F9	Histone H2B	H2BC12
Q9TTE1	Serpin A3-1 (Endopin-1A) (Muscle endopin-1A) (mEndopin-1A)	SERPINA3-1 SERPINA3A
Q3ZCH5	Zinc-alpha-2-glycoprotein (Zn-alpha-2-GP) (Zn-alpha-2-glycoprotein)	AZGP1
A0A6B9SBD0	Ig heavy chain variable region	-
A0A6B9SBF3	Ig heavy chain variable region	-
A0A6B9SBF6	Ig heavy chain variable region	-
A0A6B9SBG0	Ig heavy chain variable region	-
A0A6B9SBG7	Ig heavy chain variable region	-
A0A6B9SBI0	Ig heavy chain variable region	-
A0A6B9SBI1	Ig heavy chain variable region	-
A0A6B9SBI8	Ig heavy chain variable region	-
A0A6B9SBJ3	Ig heavy chain variable region	-
A0A6B9SBM1	Ig lamda chain variable region	-
A0A6B9SBM2	Ig lamda chain variable region	-
A0A6B9SBN1	Ig heavy chain variable region	-
A0A6B9SBQ0	Ig lamda chain variable region	-
A0A6B9SBR2	Ig lamda chain variable region	-
A0A6B9SBR3	Ig lamda chain variable region	-
A0A6B9SBR8	Ig lamda chain variable region	-
A0A6B9SBT2	Ig lamda chain variable region	-
A0A6B9SBU4	Ig lamda chain variable region	-
A0A6B9SC93	Ig heavy chain variable region	-
A0A6B9SCC1	Ig heavy chain variable region	-
A0A6B9SCD3	Ig heavy chain variable region	-
A0A6B9SCE5	Ig heavy chain variable region	-
A0A6B9SCG2	Ig lamda chain variable region	-
A0A6B9SCM2	Ig heavy chain variable region	-
A0A6B9SCN1	Ig heavy chain variable region	-
A0A6B9SCP7	Ig heavy chain variable region	-
A0A6B9SDM9	Ig heavy chain variable region	-
A0A6B9SDQ4	Ig heavy chain variable region	-
A0A6B9SDT6	Ig lamda chain variable region	-
A0A6B9SDW4	Ig lamda chain variable region	-
A0A6B9SDW5	Ig heavy chain variable region	-
A0A6B9SDX6	Ig lamda chain variable region	-
A0A6B9SDY5	Ig heavy chain variable region	-
A0A6B9SDY7	Ig lamda chain variable region	-
A0A6B9SDZ9	Ig heavy chain variable region	-
A0A6B9SE04	Ig heavy chain variable region	-
A0A6B9SE10	Ig heavy chain variable region	-
A0A6B9SE14	Ig heavy chain variable region	-
A0A6B9SE32	Ig lamda chain variable region	-
A0A6B9SE37	Ig lamda chain variable region	-
A0A6B9SE47	Ig lamda chain variable region	-
A0A6B9SE50	Ig heavy chain variable region	-
A0A6B9SE69	Ig lamda chain variable region	-
A0A6B9SE74	Ig heavy chain variable region	-
A0A6B9SE85	Ig heavy chain variable region	-
A0A6B9SE94	Ig heavy chain variable region	-
A0A6B9SEA4	Ig lamda chain variable region	-
A0A6B9SEC1	Ig lamda chain variable region	-
A0A6B9SED3	Ig lamda chain variable region	-
A0A6B9SEE4	Ig lamda chain variable region	-
A0A6B9SEF7	Ig lamda chain variable region	-
A0A6B9SEY0	Ig heavy chain variable region	-
A0A6B9SF17	Ig heavy chain variable region	-
A0A6B9SF41	Ig lamda chain variable region	-
A0A6B9SF49	Ig lamda chain variable region	-
A0A6B9SF68	Ig lamda chain variable region	-
A6QLG0	ZNF500 protein	ZNF500
P42899	Large ribosomal subunit protein P2 (60S acidic ribosomal protein P2)	RPLP2
A2I7M9	Serpin A3-2	SERPINA3-2
A2I7N1	Serpin A3-5	SERPINA3-5
G3N0K3	40S ribosomal protein S4	-
A3KLR9	Superoxide dismutase [Cu-Zn] (EC 1.15.1.1)	ECSOD
Q3ZC07	"Actin, alpha cardiac muscle 1 (EC 3.6.4.-) (Alpha-cardiac actin) [Cleaved into: Actin, alpha cardiac muscle 1, intermediate form]"	ACTC1 ACTC
A5D7Q2	Ig-like domain-containing protein	-
A5D984	Pyruvate kinase (EC 2.7.1.40)	PKM PKM2
A5PJ69	SERPINA10 protein (Serpin family A member 10)	SERPINA10
A5PJE3	Fibrinogen alpha chain	FGA
A5PJH7	LOC788112 protein (Neutrophilic granule protein-like)	LOC788112 NGP
A6H714	Mtr4 exosome RNA helicase (SKIV2L2 protein)	MTREX SKIV2L2
Q3T0S5	Fructose-bisphosphate aldolase B (EC 4.1.2.13) (Liver-type aldolase)	ALDOB
Q6T182	Sex hormone-binding globulin	SHBG
A6QM09	Ig-like domain-containing protein	-
Q95122	Monocyte differentiation antigen CD14 (Myeloid cell-specific leucine-rich glycoprotein) (CD antigen CD14)	CD14
P81265	Polymeric immunoglobulin receptor (PIgR) (Poly-Ig receptor) [Cleaved into: Secretory component]	PIGR
A6QNW7	CD5 molecule like (CD5L protein)	CD5L
A6QP30	CPN2 protein (Carboxypeptidase N subunit 2)	CPN2
A6QPP2	SERPIND1 protein	SERPIND1
A6QPP9	C-X-C motif chemokine	PF4
A6QPQ2	Serpin A3-8	SERPINA3-8
Q2KJ34	HMG box-containing protein 1 (HMG box transcription factor 1) (High mobility group box transcription factor 1)	HBP1
A7E3W2	Galectin-3-binding protein (Lectin galactoside-binding soluble 3-binding protein)	LGALS3BP
A7MB82	Adiponectin M (C1QTNF3 protein) (C1q and TNF related 3)	C1QTNF3 ADIM
A7MBJ5	Cullin-associated NEDD8-dissociated protein 1 (Cullin-associated and neddylation-dissociated protein 1)	CAND1
Q2KIW1	Paraoxonase (EC 3.1.1.2)	PON1
B0JYL8	Cofilin 1 (Non-muscle)	CFL1
P12763	Alpha-2-HS-glycoprotein (Asialofetuin) (Fetuin-A)	AHSG FETUA
B0JYQ0	ALB protein	ALB
Q6LBN7	Lactoferrin	-
B7FEK7	43kDa collectin	CL43
B8Y9S9	Fibronectin	-
B8Y9T0	Fibronectin	-
G5E5W1	Coagulation factor VIII	F8
C4T8B4	Pentraxin family member	CRP
P35445	Cartilage oligomeric matrix protein (COMP)	COMP
F1MVK1	Uncharacterized protein	LOC107131209
G3MY71	Ig-like domain-containing protein	-
A0A3Q1M1Z4	Ig-like domain-containing protein	-
E1BH94	Peptidoglycan recognition protein 2	PGLYRP2
E1BF81	Corticosteroid-binding globulin (CBG) (Serpin A6) (Transcortin)	SERPINA6 CBG
G3MXG6	Ig-like domain-containing protein	-
G3N0S9	Sushi domain-containing protein	-
Q9TS74	Pancreatic elastase inhibitor	-
P00735	Prothrombin (EC 3.4.21.5) (Coagulation factor II) [Cleaved into: Activation peptide fragment 1; Activation peptide fragment 2; Thrombin light chain; Thrombin heavy chain]	F2
P00978	Protein AMBP [Cleaved into: Alpha-1-microglobulin (EC 1.6.2.-); Inter-alpha-trypsin inhibitor light chain (ITI-LC) (BI-14) (Bikunin) (Cumulus extracellular matrix-stabilizing factor) (ESF) (HI-30); Trypstatin]	AMBP ITIL
E1BH06	Complement component 4A	C4A
P01045	Kininogen-2 (Kininogen II) (Thiol proteinase inhibitor) [Cleaved into: Kininogen-2 heavy chain; Bradykinin (Kallidin I); Lysyl-bradykinin (Kallidin II); Kininogen-2 light chain]	KNG2
P02070	Hemoglobin subunit beta (Beta-globin) (Hemoglobin beta chain) [Cleaved into: Spinorphin]	HBB
P02584	Profilin-1 (Profilin I)	PFN1
P06868	"Plasminogen (EC 3.4.21.7) [Cleaved into: Plasmin heavy chain A; Activation peptide; Plasmin heavy chain A, short form; Plasmin light chain B]"	PLG
V6F9A2	Apolipoprotein A-I preproprotein	APOA1 BOS_14342
P17697	Clusterin (Glycoprotein III) (GpIII) [Cleaved into: Clusterin beta chain; Clusterin alpha chain]	CLU
P28800	Alpha-2-antiplasmin (Alpha-2-AP) (Alpha-2-plasmin inhibitor) (Alpha-2-PI) (Serpin F2)	SERPINF2 PLI
P34955	Alpha-1-antiproteinase (Alpha-1-antitrypsin) (Alpha-1-proteinase inhibitor) (Serpin A1)	SERPINA1 PI
P50448	Factor XIIa inhibitor (XIIaINH)	-
P81644	Apolipoprotein A-II (Apo-AII) (ApoA-II) (Antimicrobial peptide BAMP-1) (Apolipoprotein A2) [Cleaved into: Proapolipoprotein A-II (ProapoA-II); Truncated apolipoprotein A-II (Apolipoprotein A-II(1-76))]	APOA2
Q05443	Lumican (Corneal keratan sulfate proteoglycan 37B core protein) (Keratan sulfate proteoglycan) (KSPG)	LUM LDC
Q05B55	IGK protein	IGK
Q29443	Serotransferrin (Transferrin) (Beta-1 metal-binding globulin) (Siderophilin)	TF
G5E513	Ig-like domain-containing protein	-
Q1RMN8	"Immunoglobulin light chain, lambda gene cluster"	IGL@
Q28065	C4b-binding protein alpha chain (C4bp)	C4BPA
Q28085	Complement factor H (H factor 1)	CFH HF1
Q2HJF0	Serotransferrin-like	LOC525947
Q2KIF2	Leucine-rich alpha-2-glycoprotein 1	LRG1
Q2KIH2	ApoN protein (Apolipoprotein N)	APON ApoN
Q2KIT0	Protein HP-20 homolog	-
Q2KIU3	Protein HP-25 homolog 2	-
Q2KJ83	Carboxypeptidase N catalytic chain (CPN) (EC 3.4.17.3) (Carboxypeptidase N polypeptide 1) (Carboxypeptidase N small subunit)	CPN1
P81187	Complement factor B (EC 3.4.21.47) (C3/C5 convertase) (EC-VMFB) [Cleaved into: Complement factor B Ba fragment; Complement factor B Bb fragment]	CFB BF
Q3MHH8	Alpha-amylase (EC 3.2.1.1)	AMY2A
Q3MHN2	Complement component C9	C9
Q3MHN5	Vitamin D-binding protein (DBP) (VDB) (Gc-globulin) (Group-specific component)	GC
F1N1I6	Gelsolin (ADF) (Actin-depolymerizing factor)	GSN
Q5GN72	Alpha-1-acid glycoprotein	agp AGP ORM1
Q58D62	Fetuin-B	FETUB
Q95121	Pigment epithelium-derived factor (PEDF) (Serpin F1)	SERPINF1 PEDF
Q9TT36	Thyroxine-binding globulin (Serpin A7) (T4-binding globulin)	SERPINA7 TBG
G3MYZ3	Afamin (Alpha-albumin)	AFM
E3SAZ8	Nucleophosmin	NPM1
E1B726	Plasminogen (EC 3.4.21.7)	PLG
E1B7G5	RNA binding motif protein 12B	RBM12B
E1B805	Complement C3	LOC528040
E1B9F6	Elongation factor 1-alpha	-
E1BA00	Proline rich acidic protein 1	PRAP1
E1BB91	Collagen type VI alpha 3 chain	COL6A3
E1BBF0	Serine/threonine kinase 31	STK31
Q56K14	Large ribosomal subunit protein P1 (60S acidic ribosomal protein P1)	RPLP1
E1BCW0	HGF activator	HGFAC
Q58DM9	Large ribosomal subunit protein uL15 (60S ribosomal protein L27a)	RPL27A
E1BFN6	Dihydropyrimidinase	DPYS
E1BFV0	Karyopherin subunit beta 1	KPNB1
E1BI98	Collagen type VI alpha 1 chain	COL6A1
E1BJ49	MBL associated serine protease 2	MASP2
E1BJN3	Amine oxidase (EC 1.4.3.-)	SAO
E1BK28	Dynein axonemal assembly factor 9	DNAAF9
E1BKZ1	Glutathione reductase (EC 1.8.1.7)	GSR
E1BL97	SRY-box transcription factor 13	SOX13
E1BM23	Rho GTPase activating protein 5	ARHGAP5
E1BME2	AP-3 complex subunit beta	AP3B2
E1BMJ0	Serpin family G member 1	SERPING1
E1BNR0	Apolipoprotein B	APOB
Q08DY9	Caspase-3 (CASP-3) (EC 3.4.22.56) [Cleaved into: Caspase-3 subunit p17; Caspase-3 subunit p12]	CASP3
P00741	Coagulation factor IX (EC 3.4.21.22) (Christmas factor) [Cleaved into: Coagulation factor IXa light chain; Coagulation factor IXa heavy chain]	F9
F1MC45	Sushi domain-containing protein	LOC100336868
F1MC70	Coiled-coil domain containing 170	CCDC170
Q32L62	Hemogen (Hemopoietic gene protein)	HEMGN
F1MFH5	Kelch like family member 42	KLHL42
Q1JPA2	Elongation factor 1-gamma (eEF-1B gamma)	EEF1G
F1MGJ5	SEL1L adaptor subunit of ERAD E3 ubiquitin ligase	SEL1L
Q3SZZ9	FGG protein (Fibrinogen gamma chain)	FGG
F1MH27	chitinase (EC 3.2.1.14)	CHIA
F1MH40	Ig-like domain-containing protein	-
F1MHG1	Matrix metallopeptidase 15	MMP15
Q0VCX1	Complement C1s subcomponent (EC 3.4.21.42) (C1 esterase) (Complement component 1 subcomponent s) [Cleaved into: Complement C1s subcomponent heavy chain; Complement C1s subcomponent light chain]	C1S
F1MJK3	Pregnancy zone protein	LOC506828
F1MKS5	Histidine rich glycoprotein	HRG
F1MLW8	Ig-like domain-containing protein	LOC100847119
F1MMD7	Inter-alpha-trypsin inhibitor heavy chain 4	ITIH4
Q2YDI9	"Ferritin, mitochondrial (EC 1.16.3.1)"	FTMT
F1MN49	Eukaryotic translation initiation factor 5A (eIF-5A)	EIF5A2
Q2T9Z0	E3 ubiquitin-protein ligase TRIM17 (EC 2.3.2.27) (RING-type E3 ubiquitin transferase TRIM17) (Tripartite motif-containing protein 17)	TRIM17
Q32KY0	Apolipoprotein D (Apo-D) (ApoD)	APOD
Q17QF1	Oncostatin M receptor	OSMR
F1MVS9	MBL associated serine protease 1	MASP1
F1MWU9	Heat shock protein family A (Hsp70) member 6	HSPA6
F1MY85	Complement C5	C5
F1MZ78	Leucine rich repeat and coiled-coil centrosomal protein 1	LRRCC1
F1MZ96	Ig-like domain-containing protein	-
F1N0I3	Coagulation factor V	F5
F1N102	Complement C8 beta chain	C8B
F1N160	Ig-like domain-containing protein	-
F1N2K1	Prenylcysteine oxidase 1 (EC 1.8.3.5) (Prenylcysteine lyase)	PCYOX1
F1N3G4	Condensin complex subunit 1	NCAPD2
V6F7X3	Apolipoprotein A-IV	APOA4 BOS_14370
I7CT57	Vitamin D-binding protein (Gc-globulin) (Group-specific component)	-
F6QND5	Fibrinogen alpha chain	FGA
G3MYD0	Zinc finger protein 181	ZNF181
G3N0V0	Ig-like domain-containing protein	-
G3N148	Ig-like domain-containing protein	-
G3N1H5	Ig-like domain-containing protein	LOC100300716
G3N1U4	Endopin 1b	SERPINA3-3
G3N342	Ig-like domain-containing protein	-
G3N3S2	Maltase-glucoamylase	MGAM
G3X6N3	Serotransferrin (Beta-1 metal-binding globulin) (Siderophilin)	TF
G3X6Y4	Osteomodulin	OMD
G3X7N4	Phosphoglycerate kinase (EC 2.7.2.3)	PGK1
G5E507	Heat shock protein 90 alpha family class B member 1	HSP90AB1
G5E5H2	Ig-like domain-containing protein	-
G5E5T5	Ig-like domain-containing protein	-
G5E604	Ig-like domain-containing protein	-
G8JKW7	Endopin 2	SERPINA3-7
G8JKY5	Thymosin beta	TMSB4X
O46737	MHC class I heavy chain	-
K4JB97	Alpha-2-macroglobulin variant 4	A2M
K4JF16	Alpha-2-macroglobulin variant 23	A2M
Q862L1	"Similar to tumor protein, translationally-controlled 1"	-
M5FKF4	"Insulin-like growth factor binding protein, acid labile subunit"	IGFALS BOS_22497
O02659	Mannose-binding protein C (MBP-C) (Mannan-binding protein)	MBL
O46375	Transthyretin (Prealbumin)	TTR
O97941	Complement component 3	-
P00921	Carbonic anhydrase 2 (EC 4.2.1.1) (Carbonate dehydratase II) (Carbonic anhydrase II) (CA-II) (Cyanamide hydratase CA2) (EC 4.2.1.69)	CA2
P01017	Angiotensinogen (Serpin A8) [Cleaved into: Angiotensin-1 (Angiotensin 1-10) (Angiotensin I) (Ang I); Angiotensin-2 (Angiotensin 1-8) (Angiotensin II) (Ang II); Angiotensin-3 (Angiotensin 2-8) (Angiotensin III) (Ang III) (Des-Asp[1]-angiotensin II); Angiotensin-4 (Angiotensin 3-8) (Angiotensin IV) (Ang IV); Angiotensin 1-9; Angiotensin 1-7; Angiotensin 1-5; Angiotensin 1-4]	AGT SERPINA8
P01030	Complement C4 [Cleaved into: Complement C4 alpha chain; C4a anaphylatoxin; Complement C4 gamma chain]	C4
P01252	"Prothymosin alpha [Cleaved into: Prothymosin alpha, N-terminally processed; Thymosin alpha-1]"	PTMA
Q95ND9	Pro alpha 1(I) collagen	COL1A1
P04272	Annexin A2 (Annexin II) (Annexin-2) (Calpactin I heavy chain) (Calpactin-1 heavy chain) (Chromobindin-8) (Lipocortin II) (Placental anticoagulant protein IV) (PAP-IV) (Protein I) (p36)	ANXA2 ANX2
P10096	Glyceraldehyde-3-phosphate dehydrogenase (GAPDH) (EC 1.2.1.12) (Peptidyl-cysteine S-nitrosylase GAPDH) (EC 2.6.99.-)	GAPDH GAPD
P12260	Coagulation factor XIII A chain (Coagulation factor XIIIa) (EC 2.3.2.13) (Protein-glutamine gamma-glutamyltransferase A chain) (Transglutaminase A chain)	F13A1 F13A
V6F9A3	Apolipoprotein C-III (Apolipoprotein C3)	ApoC3 BOS_14347
P19120	Heat shock cognate 71 kDa protein (EC 3.6.4.10) (Heat shock 70 kDa protein 8)	HSPA8 HSC70
P23805	Conglutinin	CGN1
P25326	Cathepsin S (EC 3.4.22.27)	CTSS
P37141	Glutathione peroxidase 3 (GPx-3) (GSHPx-3) (EC 1.11.1.9) (Plasma glutathione peroxidase) (GPx-P) (GSHPx-P)	GPX3
P48616	Vimentin	VIM
P60712	"Actin, cytoplasmic 1 (EC 3.6.4.-) (Beta-actin) [Cleaved into: Actin, cytoplasmic 1, N-terminally processed]"	ACTB
Q9N138	Peptidyl-prolyl cis-trans isomerase (PPIase) (EC 5.2.1.8)	-
P63258	"Actin, cytoplasmic 2 (EC 3.6.4.-) (Gamma-actin) [Cleaved into: Actin, cytoplasmic 2, N-terminally processed]"	ACTG1 ACTG
P79346	Protein kinase C delta isoform	-
P80109	Phosphatidylinositol-glycan-specific phospholipase D (PI-G PLD) (EC 3.1.4.50) (Glycoprotein phospholipase D) (Glycosyl-phosphatidylinositol-specific phospholipase D) (GPI-PLD) (GPI-specific phospholipase D)	GPLD1 PIGPLD
P81947	Tubulin alpha-1B chain (EC 3.6.5.-) (Alpha-tubulin ubiquitous) (Tubulin K-alpha-1) (Tubulin alpha-ubiquitous chain) [Cleaved into: Detyrosinated tubulin alpha-1B chain]	-
P98140	Coagulation factor XII (EC 3.4.21.38) (Hageman factor) (HAF) [Cleaved into: Coagulation factor XIIa heavy chain; Coagulation factor XIIa light chain]	F12
Q09TE3	Insulin-like growth factor binding protein acid labile subunit	IGFALS
Q0IID3	Guanylate binding protein 5	GBP5
Q0VC36	14-3-3 protein sigma (Stratifin)	SFN
Q0VCX2	Endoplasmic reticulum chaperone BiP (EC 3.6.4.10) (78 kDa glucose-regulated protein) (GRP-78) (Binding-immunoglobulin protein) (BiP) (Heat shock protein 70 family protein 5) (HSP70 family protein 5) (Heat shock protein family A member 5) (Immunoglobulin heavy chain-binding protein)	HSPA5 GRP78
Q17QH1	APOF protein (Apolipoprotein F)	APOF
Q1RMN9	C4b-binding protein alpha-like	LOC510860
Q28194	Thrombospondin-1	-
Q29437	"Primary amine oxidase, liver isozyme (EC 1.4.3.21) (Amine oxidase [copper-containing]) (Copper amine oxidase) (Serum amine oxidase) (SAO)"	-
Q2KIW4	Lecithin-cholesterol acyltransferase	LCAT
Q2KIX7	Protein HP-25 homolog 1	-
Q2KJ63	Plasma kallikrein (EC 3.4.21.34) (Fletcher factor) (Kininogenin) (Plasma prekallikrein) [Cleaved into: Plasma kallikrein heavy chain; Plasma kallikrein light chain]	KLKB1
Q2KJD0	Tubulin beta-5 chain	TUBB5
Q2KJH6	Serpin H1 (Collagen-binding protein) (Colligin)	SERPINH1
Q2TBV0	Protein BEX2 (Brain-expressed X-linked protein 2 homolog)	BEX2
Q2UVX4	Complement C3 [Cleaved into: Complement C3 beta chain; Complement C3 alpha chain; C3a anaphylatoxin; C3-beta-c (C3bc); Acylation stimulating protein (ASP) (C3adesArg); Complement C3b alpha' chain; Complement C3c alpha' chain fragment 1; Complement C3dg fragment; Complement C3g fragment; Complement C3d fragment; Complement C3f fragment; Complement C3c alpha' chain fragment 2]	C3
Q32L76	Serum amyloid A-4 protein	SAA4
Q32PA1	"CD59 molecule (CD59 molecule, complement regulatory protein)"	CD59
Q3MHM5	Tubulin beta-4B chain (Tubulin beta-2C chain)	TUBB4B TUBB2C
Q3SX47	Heterogeneous nuclear ribonucleoprotein C (C1/C2) (Heteroous nuclear ribonucleoprotein C)	HNRPC HNRNPC
Q3SYR5	Apolipoprotein C-IV (Apo-CIV) (ApoC-IV) (Apolipoprotein C4)	APOC4
Q3SYR8	Immunoglobulin J chain (Joining chain of multimeric IgA and IgM)	JCHAIN IGJ
Q3SYU2	Elongation factor 2 (EF-2) (EC 3.6.5.-)	EEF2
Q3SZV7	Hemopexin	HPX
Q3T004	Serum amyloid P-component (SAP)	APCS
Q3T0A3	Complement factor D (EC 3.4.21.46) (Adipsin) (C3 convertase activator) (Properdin factor D)	CFD
Q3T0J0	3'-phosphoadenosine 5'-phosphosulfate synthase 1	PAPSS1
Q3T0Q4	Nucleoside diphosphate kinase B (NDK B) (NDP kinase B) (EC 2.7.4.6) (Histidine protein kinase NDKB) (EC 2.7.13.3)	NME2
Q3T101	IGL@ protein	IGL@
Q5E970	RNA helicase (EC 3.6.4.13)	DDX39A DDX39
Q3YJG7	MHC class I antigen	BoLA
Q3ZBH0	T-complex protein 1 subunit beta (TCP-1-beta) (CCT-beta)	CCT2
Q3ZBS7	Vitronectin	VTN
Q3ZEJ6	Serpin A3-3 (Endopin-1B) (Muscle endopin-1B) (mEndopin-1B)	SERPINA3-3
Q56JX6	Small ribosomal subunit protein eS28 (40S ribosomal protein S28)	RPS28
Q58CQ9	Pantetheinase (EC 3.5.1.92) (Pantetheine hydrolase) (Vascular non-inflammatory molecule 1) (Vanin-1)	VNN1
Q5E983	Elongation factor 1-beta (EF-1-beta)	EEF1B
Q5E9A1	Nascent polypeptide-associated complex subunit alpha (NAC-alpha) (Alpha-NAC)	NACA
Q5E9E3	Complement C1q subcomponent subunit A	C1QA
Q5E9Z2	Hyaluronan-binding protein 2 (EC 3.4.21.-) [Cleaved into: Hyaluronan-binding protein 2 50 kDa heavy chain; Hyaluronan-binding protein 2 50 kDa heavy chain alternate form; Hyaluronan-binding protein 2 27 kDa light chain; Hyaluronan-binding protein 2 27 kDa light chain alternate form]	HABP2
Q5H9M6	Dynein heavy chain	Bv2
Q6Q0I7	Blood coagulation factor XI	-
Q76LV2	Heat shock protein HSP 90-alpha (EC 3.6.4.10)	HSP90AA1 HSP90A HSPCA
Q7PCJ8	Thialysine N-epsilon-acetyltransferase (EC 2.3.1.-) (Diamine acetyltransferase 2) (EC 2.3.1.57) (Spermidine/spermine N(1)-acetyltransferase 2) (SSAT-2)	SAT2 SSAT2
Q7SIH1	Alpha-2-macroglobulin (Alpha-2-M)	A2M
Q95M18	Endoplasmin (94 kDa glucose-regulated protein) (GRP-94) (Heat shock protein 90 kDa beta member 1)	HSP90B1 GRP94 TRA1
Q9BGI3	Peroxiredoxin-2 (EC 1.11.1.24) (Thioredoxin-dependent peroxiredoxin 2)	PRDX2
Q9TS85	Histidine-rich GLYCOPROTEIN=FACTOR XIIIA substrate	-
Q9XSC6	Creatine kinase M-type (EC 2.7.3.2) (Creatine kinase M chain) (Creatine phosphokinase M-type) (CPK-M) (M-CK)	CKM
